# Supplementary material
Source: PubMed Central journal article supplement (PMC7754790)
Supplement: NIHMS1651537-supplement-Supplementary_Figures.pdf [file NIHMS1651537-supplement-Supplementary_Figures.pdf]

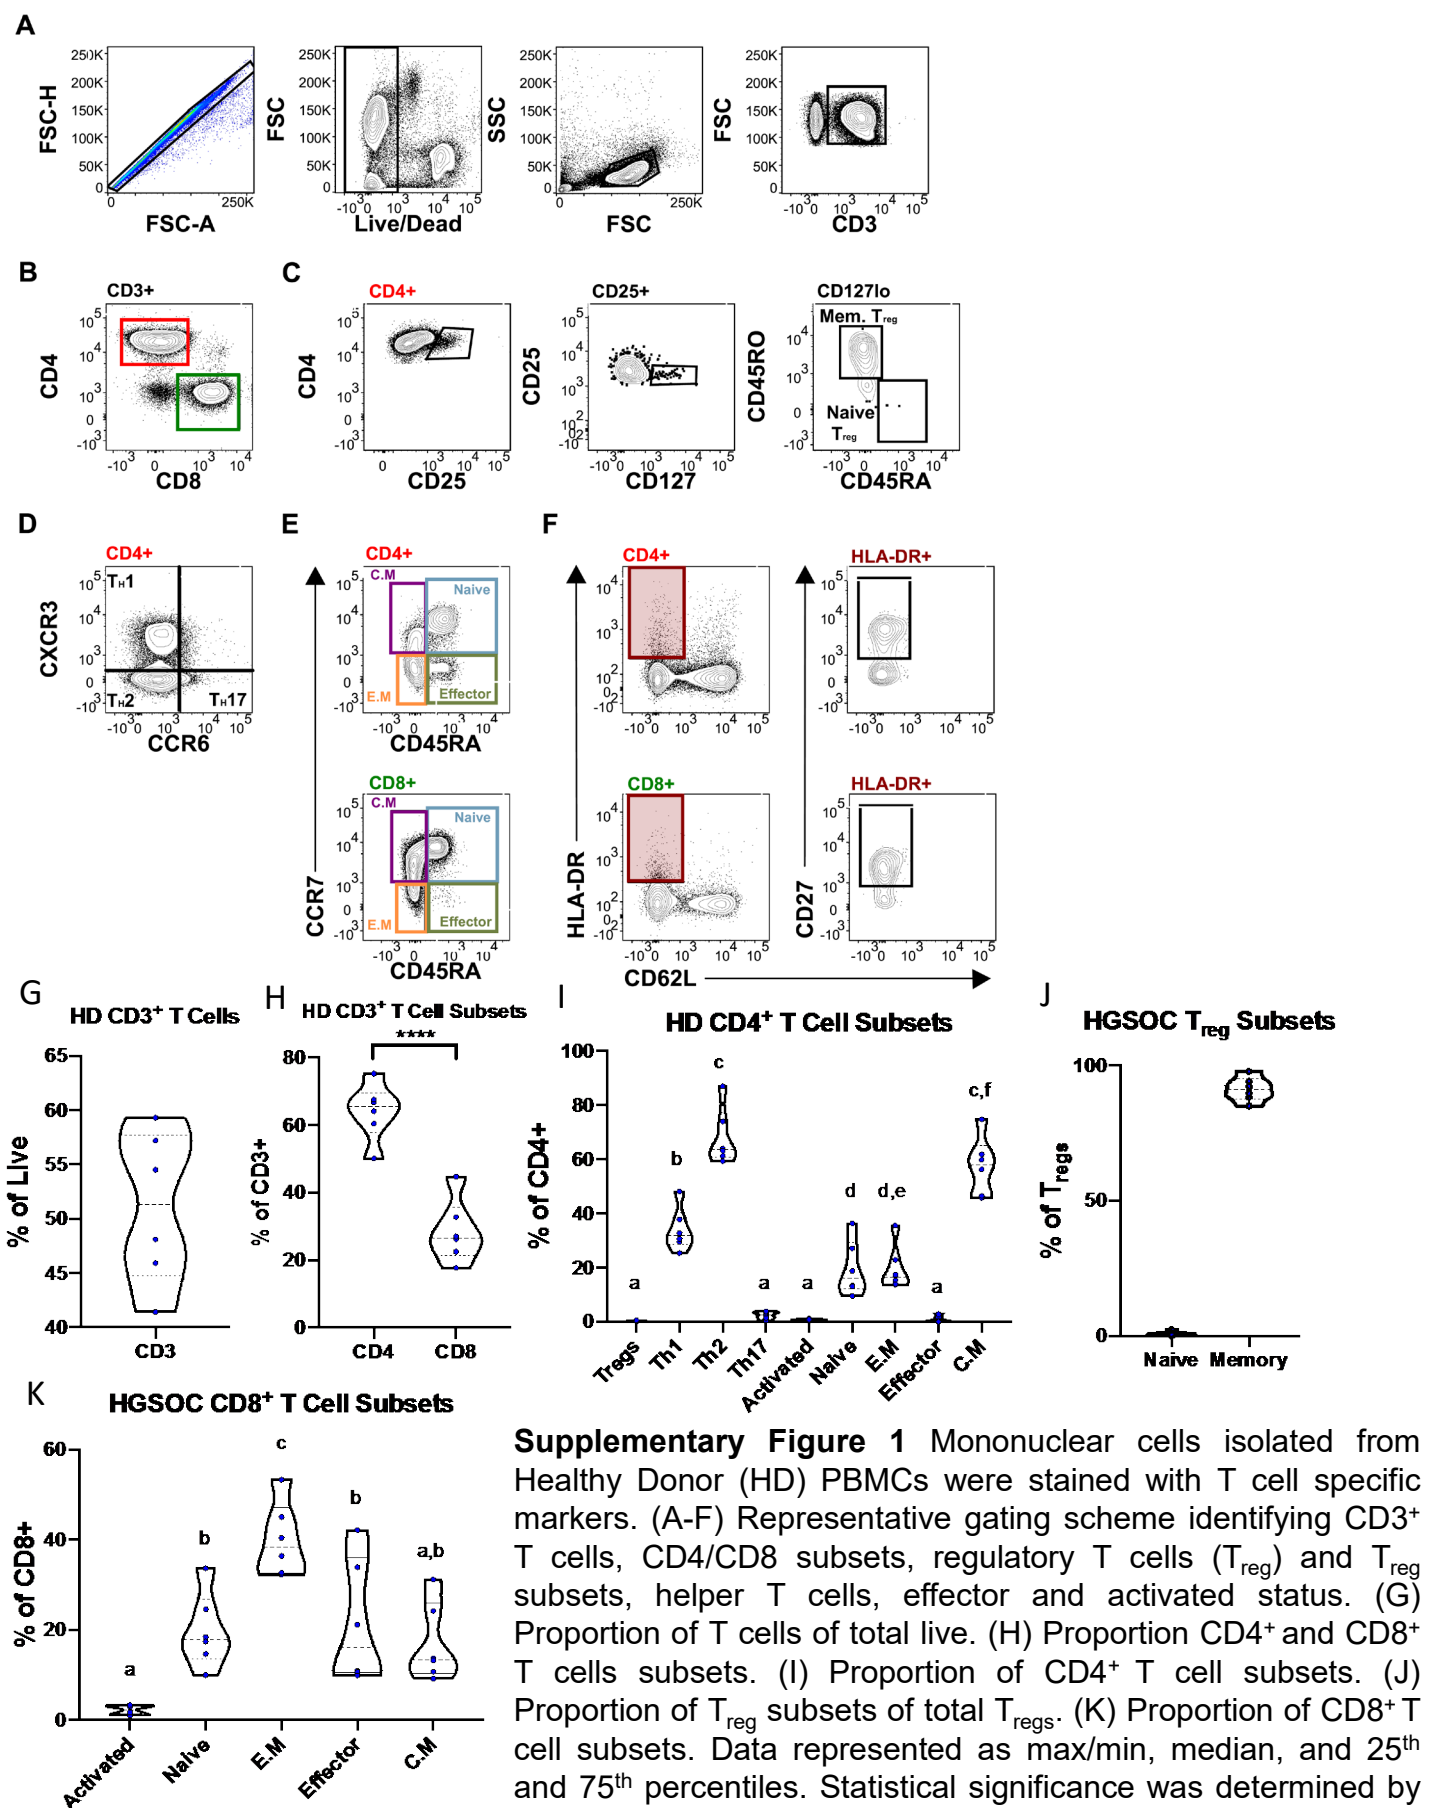

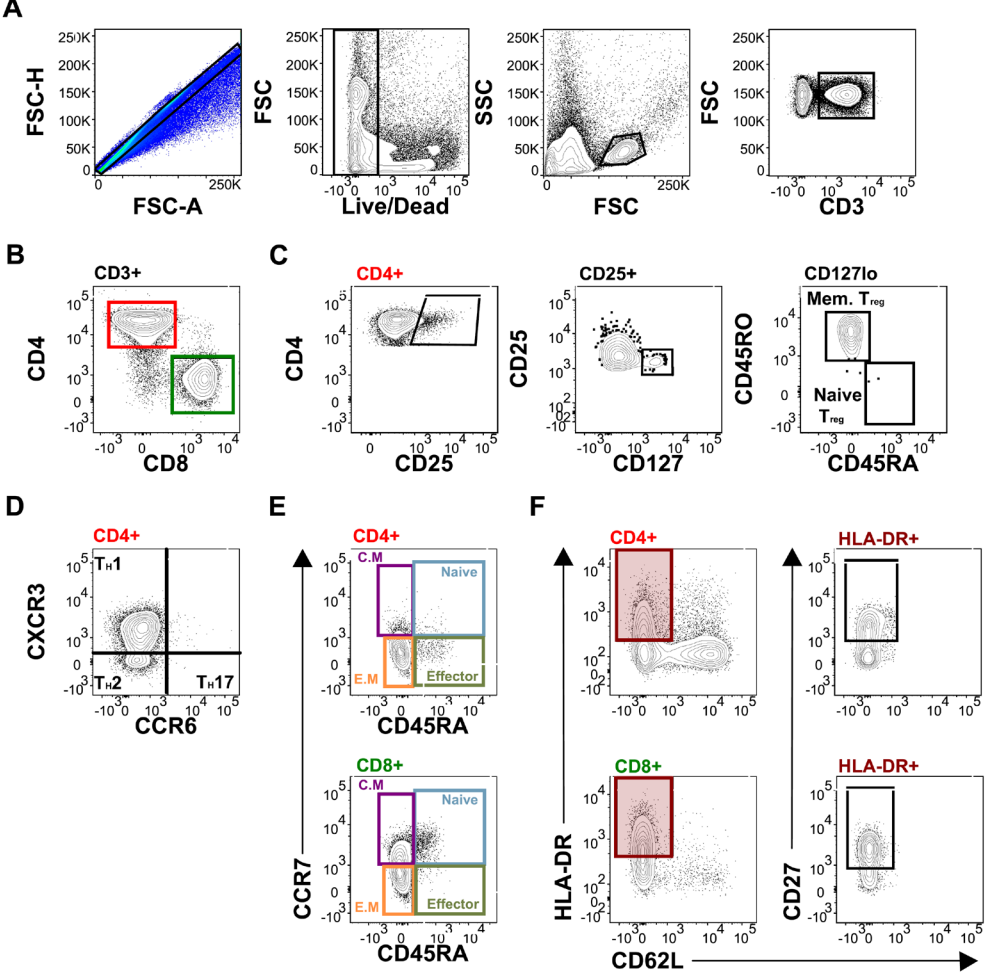

**Supplementary Figure 2** Identification of T cells and T cell subsets in HGSOC Ascites.

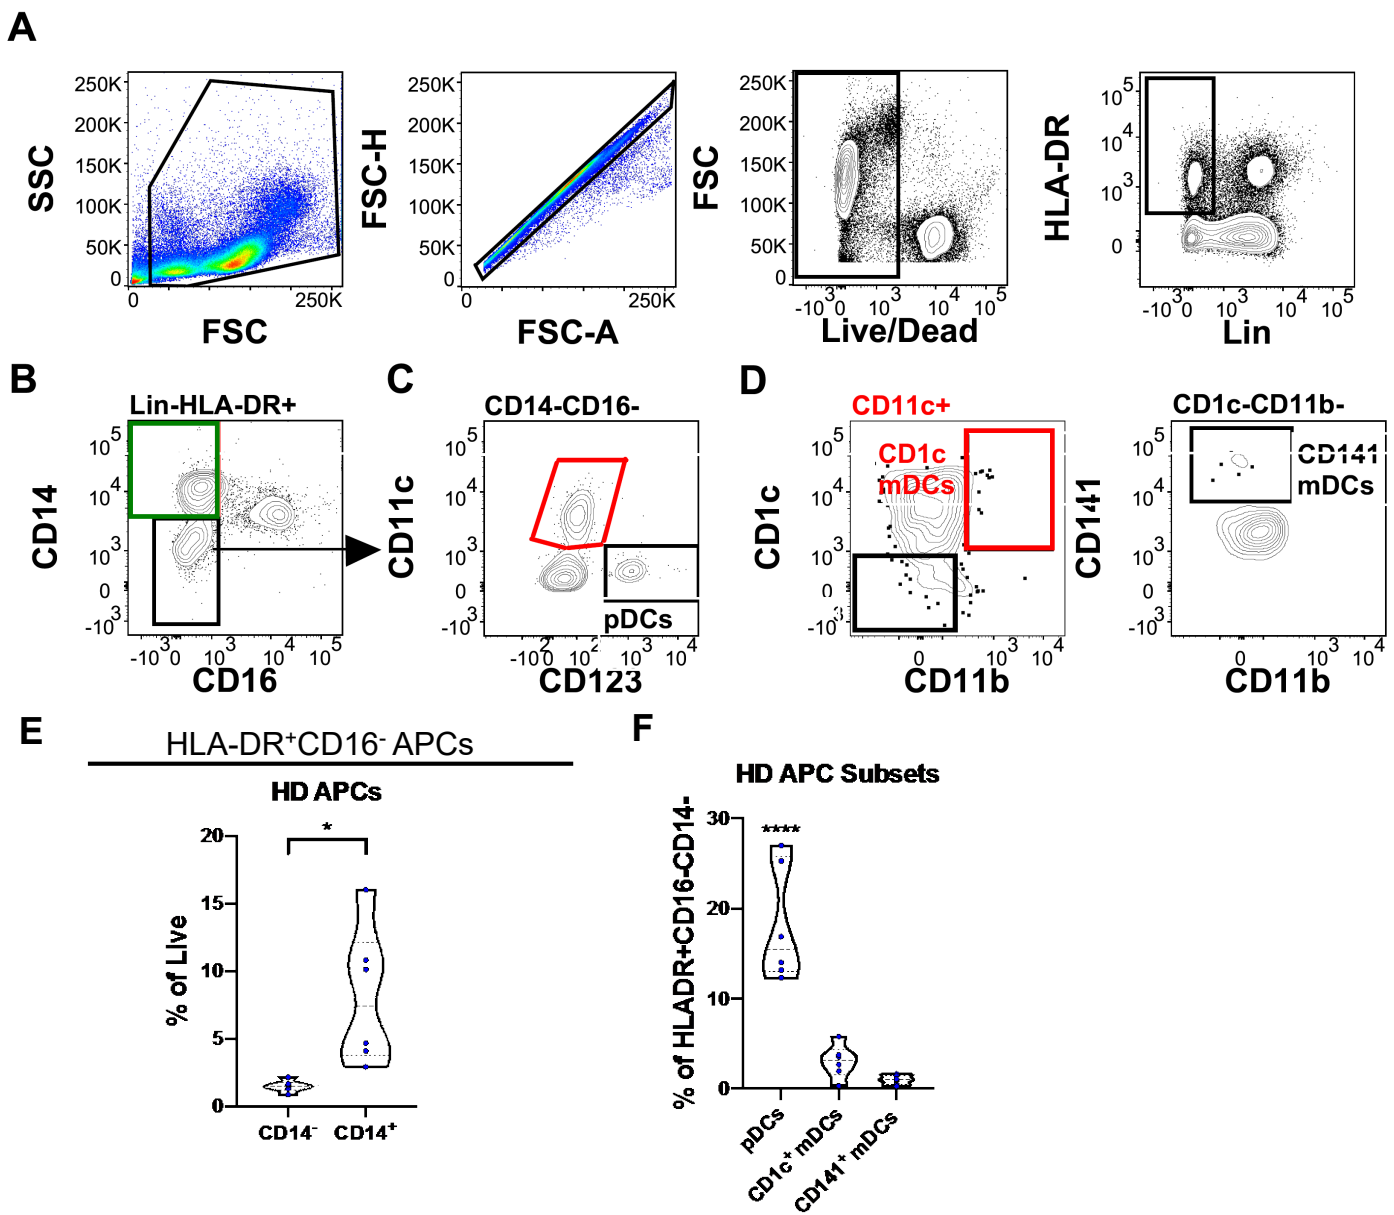

**Supplementary Figure 3** Identification of antigen presenting cells (APCs) in HD PBMCs. (A) Representative gating scheme identifying Lin(CD3,19,56)<sup>-</sup>HLA-DR<sup>+</sup> cells in HD PBMCs. (B) Representative gating scheme identifying dendritic cells (DCs; HLA-DR<sup>+</sup>CD14<sup>-</sup>CD16<sup>-</sup>) and macrophages (HLA-DR<sup>+</sup>CD14<sup>+</sup>CD16<sup>-</sup>). (C) Representative gating scheme identifying myeloid (mDCs) and plasmacytoid dendritic cells (pDCs). (D) Representative gating scheme identifying CD1c<sup>+</sup> mDCs (left) and CD141<sup>+</sup> mDCs (right). (E) Proportion of HLA-DR<sup>+</sup>CD16<sup>-</sup> CD14<sup>-</sup> and CD14<sup>+</sup> APCs from total live cells. (F) Proportion of pDCs, CD1c mDCs, and CD141 mDCs from total DCs. Data represented as max/min, median, and 25<sup>th</sup> and 75<sup>th</sup> percentiles. Statistical significance was determined by ANOVA followed by Tukey test. \* $p < 0.05$ , \*\*\*\* $p < 0.0001$ . HD,  $n = 6$ .

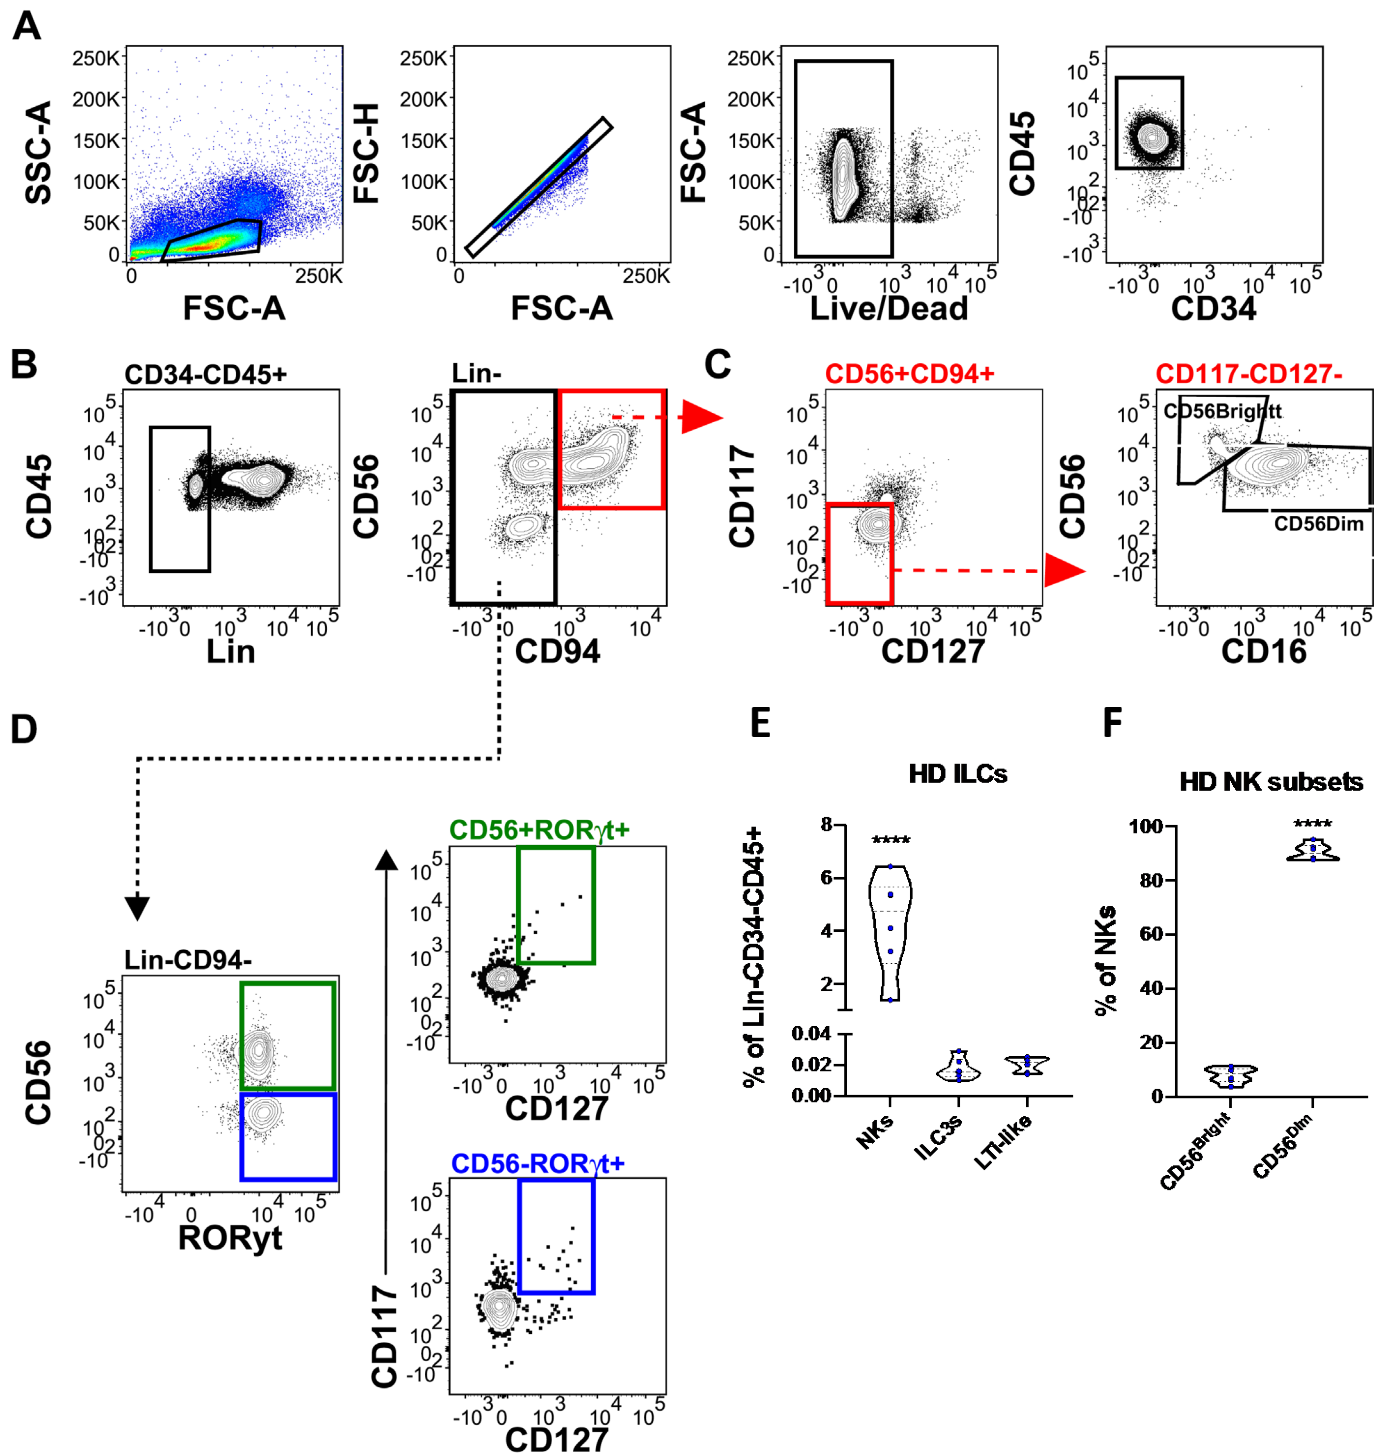

**Supplementary Figure 4** Identification of innate lymphoid cells (ILCs) in HD PBMCs.

Mononuclear cells isolated from HD PBMCs were stained with innate lymphoid cells (ILC) lineage defining markers. (A) Representative gating scheme identifying CD34-CD45<sup>+</sup> cells in HD PBMCs. (B) Representative gating scheme identifying Lin (CD3, 14, 19) negative ILCs. (C) Representative gating scheme identifying natural killer cells (NKs) and NK subsets, CD56<sup>Bright/Dim</sup>. (D) Representative gating scheme identifying ILC3s (top) and Lti-like (bottom) cells. (E) Proportion of NKs, ILC3s, and LTI-like cells in HD PBMCs from total lineage negative lymphoid cells. (F) Proportion of NK cells subsets from total NK cells. Data represented as max/min, median, and 25<sup>th</sup> and 75<sup>th</sup> percentiles. Statistical significance was determined by ANOVA followed by Tukey test. \*\*\*\*p < 0.0001. HD, n = 6.

## T Cells

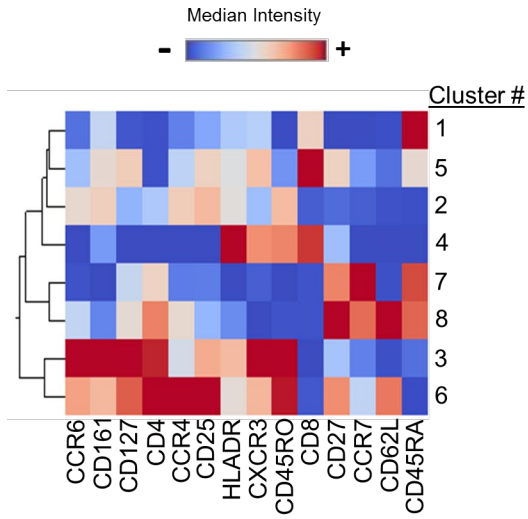

## DCs

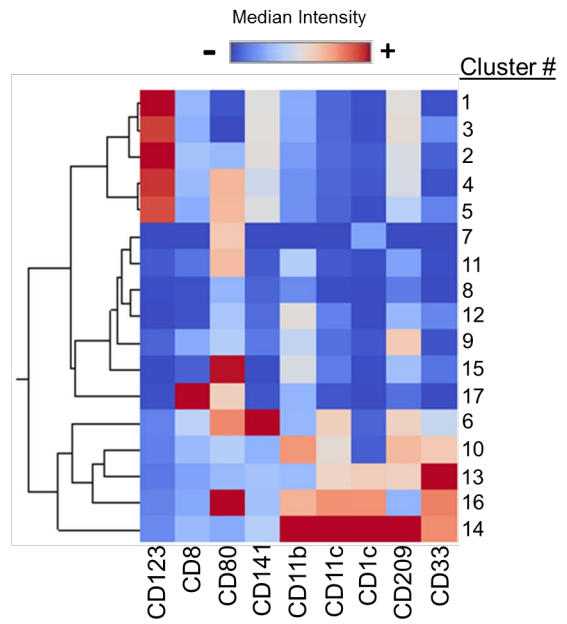

## ILCs

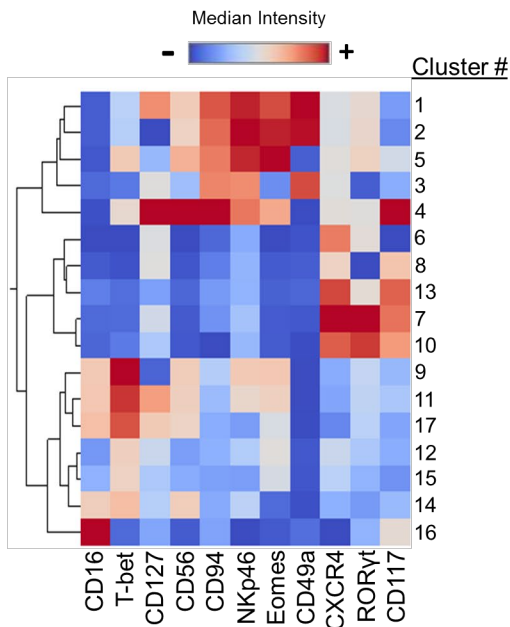

**Supplementary Figure 5.** T cell, DC and ILC clusters as defined by expression levels of specific antigens.
