# Supplementary material
Source: PubMed Central journal article supplement (PMC7754790)
Supplement: NIHMS1651537-supplement-Supplementary_Table_S1.pdf [file NIHMS1651537-supplement-Supplementary_Table_S1.pdf]

**Table S1. Classification of T cell, DC and ILC clusters based on potential function. The predictions of the phenotypes are based on extensive literature searches.**

**T cell clustering Phenotypes**

| Cluster | Phenotype                                                                       | Presumed Name                                         |
|---------|---------------------------------------------------------------------------------|-------------------------------------------------------|
| 1       | CD196-CD161-CD127-CD4-CCR4-CD25-HLADR-CD183-CD45RO-CD8+CD27-CD197-CD62L-CD45RA+ | CD8 Effector T Cell                                   |
| 2       | CD196+CD161+CD127-CD4-CCR4+CD25+HLADR+CD183-CD45RO+CD8-CD27-CD197-CD62L-CD45RA- | Activated T Cell                                      |
| 3       | CD196+CD161+CD127+CD4+CCR4-CD25+HLADR+CD183+CD45RO+CD8-CD27-CD197-CD62L-CD45RA- | Effector Memory T Regulatory                          |
| 4       | CD196-CD161-CD127-CD4-CCR4-CD25-HLADR+CD183+CD45RO+CD8+CD197-CD62L-CD45RA-      | HLADR+ CD183+ CD8 T Effector Memory Cell              |
| 5       | CD196-CD161+CD127+CD4-CCR4-HLADR-CD183+CD45RO-CD8+CD27+CD197-CD62L-CD45RA+      | CD8 Effector Cell                                     |
| 6       | CD196+CD161+CD127+CD4+CCR4+CD25+HLADR-CD183+CD45RO+CD8-CD27+CD197-CD62L+CD45RA- | Central Memory T Cell or Effector Memory T Regulatory |
| 7       | CD196-CD161-CD127-CD4+CCR4-CD25-HLADR-CD183-CD45RO-CD8-CD27+CD197+CD62L-CD45RA+ | Naïve T Cell without CD127+                           |
| 8       | CD196-CD161-CD127+CD4+CCR4+CD25-HLADR-CD183-CD45RO-CD8-CD27+CD197+CD62L+CD45RA+ | CD62L+ Naïve T Cell                                   |

**Table S1 (contd). Classification of T cell, DC and ILC clusters based on potential function. The predictions of the phenotypes are based on extensive literature searches.**

### DC clustering Phenotypes

| Cluster | Phenotype                                    | Presumed Name                                       |
|---------|----------------------------------------------|-----------------------------------------------------|
| 1       | CD123+CD8-CD80-CD11b-CD11c-CD1c-CD33-        | CD8alpha-negative, CD11b-negative dendritic cell    |
| 2       | CD123+CD8-CD80-CD11b-CD11c-CD1c-CD33-        | CD8alpha-negative, CD11b-negative dendritic cell    |
| 3       | CD123+CD8-CD80-CD11b-CD11c-CD1c-CD33-        | CD8alpha-negative, CD11b-negative dendritic cell    |
| 4       | CD123+CD8-CD80+CD11b-CD11c-CD1c-CD33-        | immature CD11c-negative plasmacytoid dendritic cell |
| 5       | CD123+CD8-CD80+CD11b-CD11c-CD1c-CD33-        | immature CD11c-negative plasmacytoid dendritic cell |
| 6       | CD123-CD8-CD80+CD141+CD11b-CD11c+CD209+CD33- | CD141-positive myeloid dendritic cell               |
| 7       | CD123-CD8-CD80+CD141-CD11b-CD11c-CD209-CD33- | Mature dendritic cell                               |
| 8       | CD123-CD8-CD80-CD141-CD11b-CD11c-CD209-CD33- | Unknown                                             |
| 9       | CD123-CD8-CD80-CD141-CD11b-CD11c-CD209+CD33- | Immature monocyte-derived dendritic cell            |
| 10      | CD123-CD8-CD80-CD141-CD11b+CD11c+CD209+CD33+ | CD11b-positive dendritic cell                       |
| 11      | CD123-CD8-CD80+CD141-CD11b-CD11c-CD209-CD33- | Mature dendritic cell                               |
| 12      | CD123-CD8-CD80-CD141-CD11b-CD11c-CD209-CD33- | Unknown                                             |
| 13      | CD123-CD8-CD80-CD141-CD11b-CD11c+CD209+CD33+ | CD1c-positive myeloid dendritic cell                |
| 14      | CD123-CD8-CD80-CD141-CD11b+CD11c+CD209+CD33+ | CD11b-positive dendritic cell                       |
| 15      | CD123-CD8-CD80+CD141-CD11b-CD11c-CD209-CD33- | Mature dendritic cell                               |
| 16      | CD123-CD8-CD80+CD141-CD11b-CD11c+CD209-CD33+ | CD11b-positive dendritic cell                       |
| 17      | CD123-CD8+CD80+CD141-CD11b-CD11c-CD209-CD33- | Unknown                                             |

**Table S1 (contd). Classification of T cell, DC and ILC clusters based on potential function. The predictions of the phenotypes are based on extensive literature searches.**

### ILC clustering Phenotypes

| Cluster | Phenotype                                                      | Presumed Name                                  |
|---------|----------------------------------------------------------------|------------------------------------------------|
| 1       | CD16-Tbet-CD127+CD56+CD94+NKp46+Eomes+CD49a+CD117-             | Tissue-resident like Natural Killer Cells      |
| 2       | CD16-Tbet-CD127-CD56+CD94+NKp46+Eomes+CD49a+CD117-             | Tissue-resident like Natural Killer Cells      |
| 3       | CD16-Tbet-CD56-CD94+NKp46+Eomes-CD49a+RORyt-CD117-             | Tissue-resident like Natural Killer Cells      |
| 4       | CD16-Tbet+CD127+CD56+CD94+NKp46+Eomes+CD49a-RORyt-CD117+       | CD16-negative, CD56-bright natural killer cell |
| 5       | CD16-Tbet+CD127-CD56+CD94+NKp46+Eomes+CD49a-RORyt+CD117-       | ILC3-like                                      |
| 6       | CD16-Tbet-CD127-CD56-CD94-NKp46-Eomes-CD49a-CXCR4+CD117-       | ILC1-like                                      |
| 7       | CD16-Tbet-CD127-CD56-CD94-NKp46-Eomes-CD49a-CXCR4+RORyt+CD117+ | Lti-like                                       |
| 8       | CD16-Tbet-CD127-CD56-CD94-NKp46-Eomes-CD49a-CXCR4+RORyt-CD117+ | ILC1-like                                      |
| 9       | CD16+Tbet+CD127-CD56+CD94-NKp46+Eomes+CD49a-CXCR4-RORyt-CD117- | cNKs                                           |
| 10      | CD16-Tbet-CD127-CD56-CD94-NKp46-Eomes-CD49a-CXCR4+RORyt+CD117+ | ILC3-like                                      |
| 11      | CD16+Tbet+CD127+CD56+CD94-NKp46-Eomes+CD49a-CXCR4-RORyt-CD117- | cNKs                                           |
| 12      | CD16-Tbet+CD127-CD56+CD94-NKp46-Eomes-CD49a-CXCR4-RORyt-CD117- | CD16-negative, CD56-bright natural killer cell |
| 13      | CD16-Tbet-CD127-CD56-CD94-NKp46-Eomes-CD49a-CXCR4+RORyt-CD117+ | Unknown                                        |
| 14      | CD16+Tbet+CD127-CD56+CD94-NKp46-Eomes-CD49a-CXCR4-RORyt-CD117- | cNKs                                           |
| 15      | CD16-Tbet+CD127-CD56-CD94-NKp46-Eomes-CD49a-CXCR4-RORyt-CD117- | Unknown                                        |
| 16      | CD16+Tbet-CD127-CD56-CD94-NKp46-Eomes-CD49a-CXCR4-RORyt-CD117+ | Unknown                                        |
| 17      | CD16+Tbet+CD127+CD56+CD94-NKp46-Eomes-CD49a-CXCR4-RORyt-CD117- | cNKs                                           |
